# Supplementary material
Source: PubMed Central journal article supplement (PMC2840532)

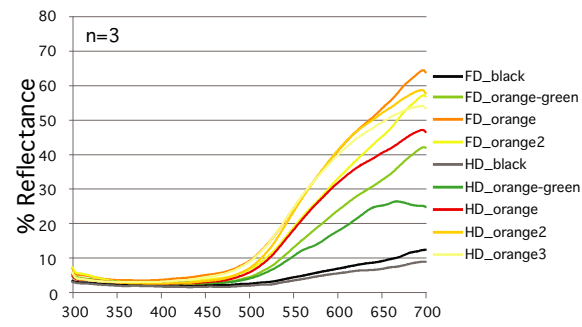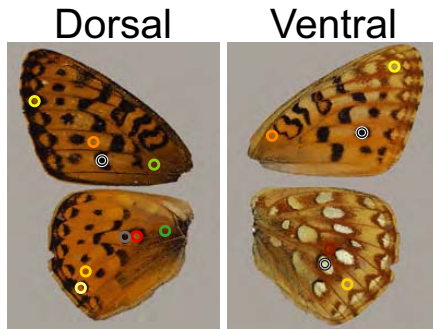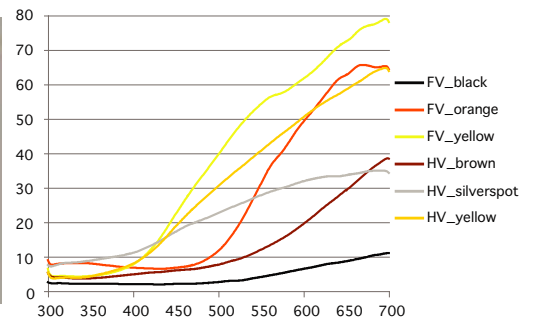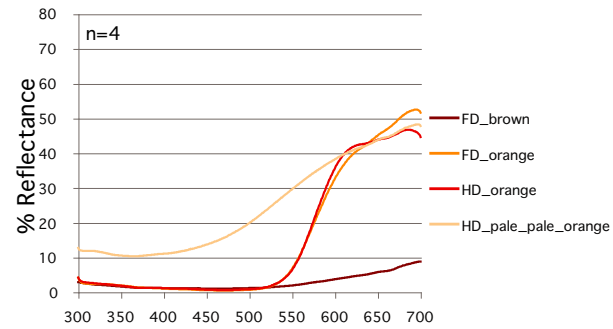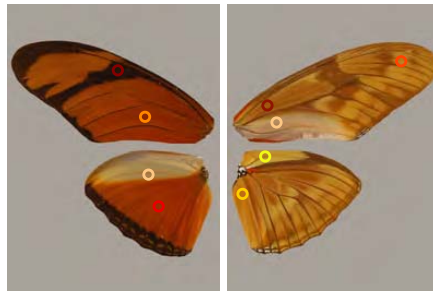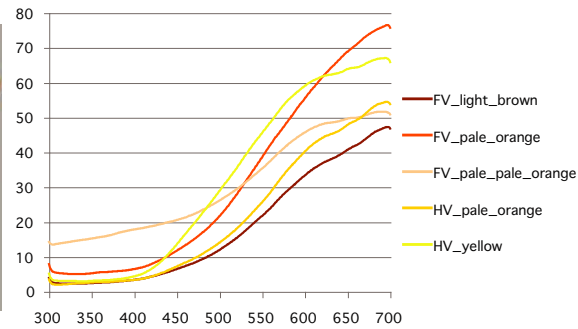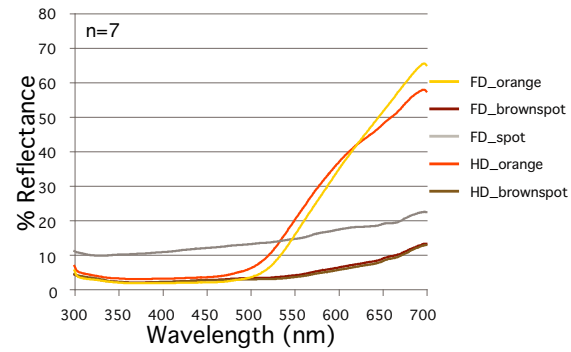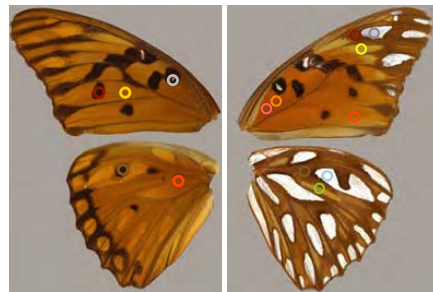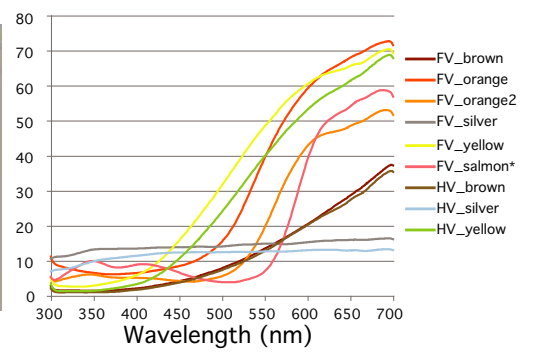

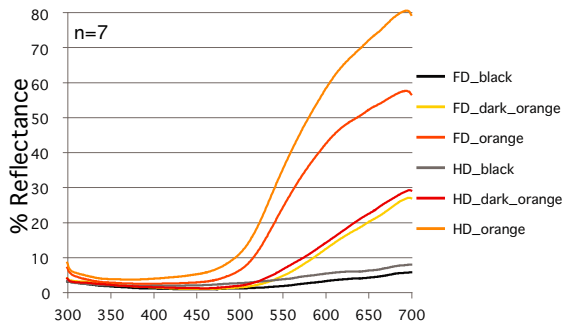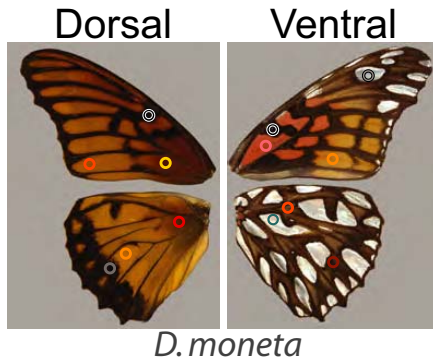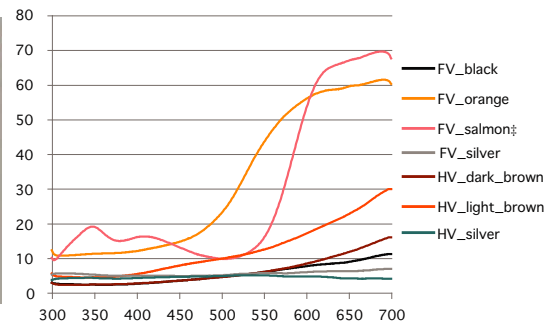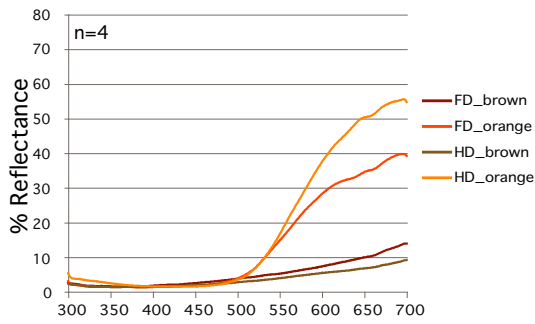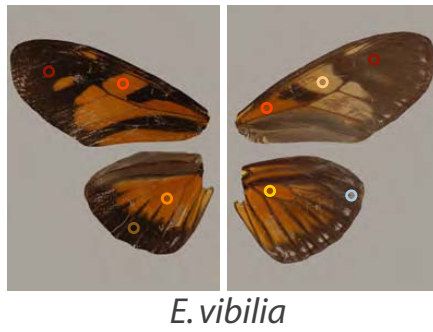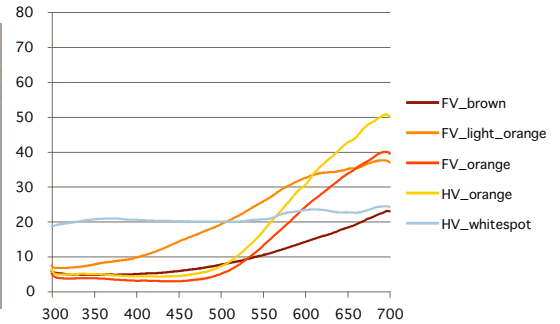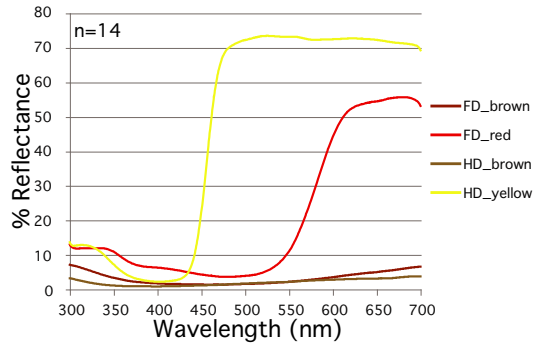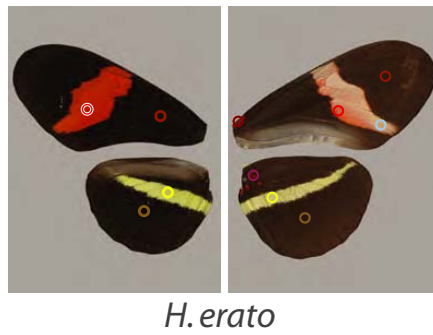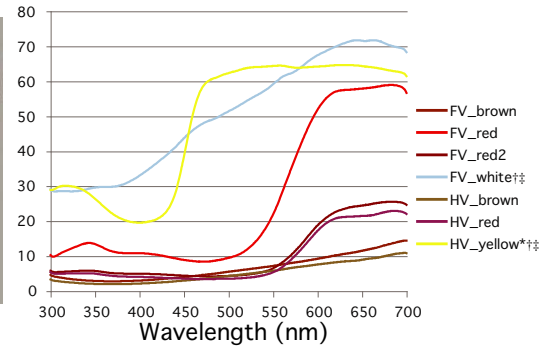

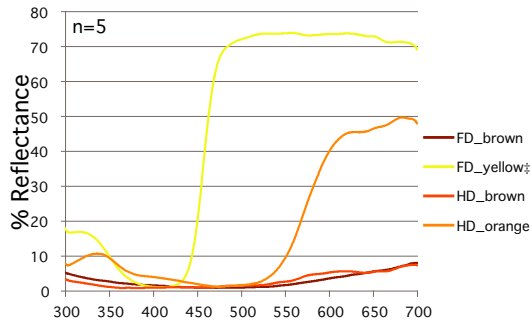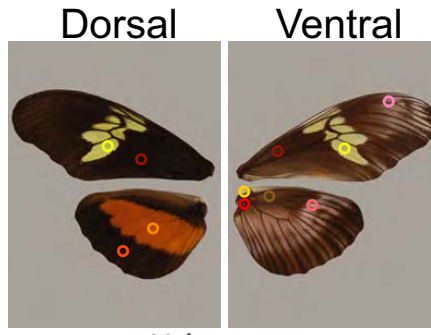

*H. hortense*

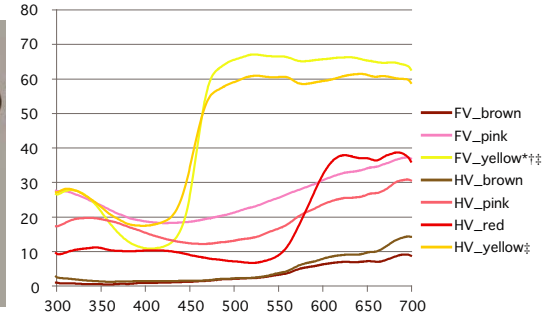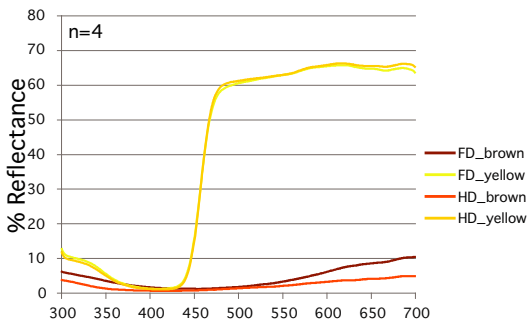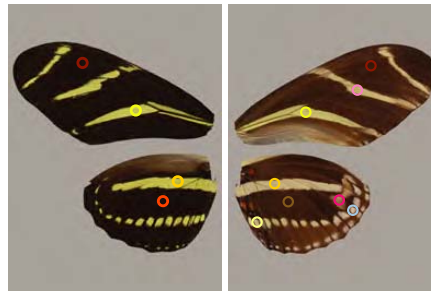

*H. charithonia*

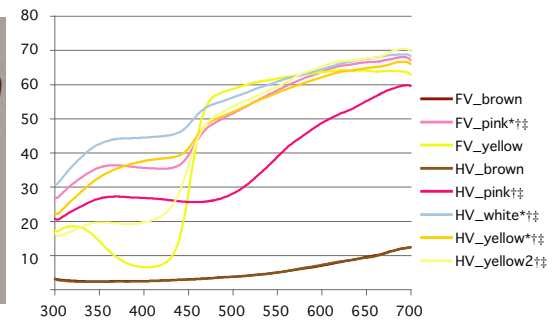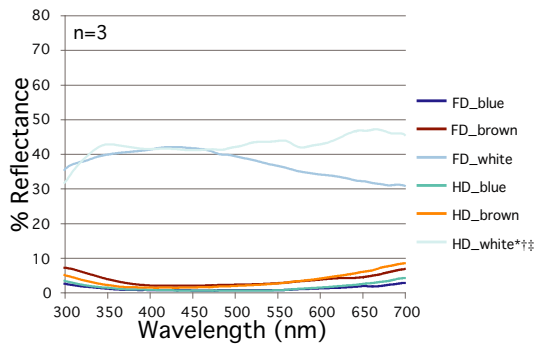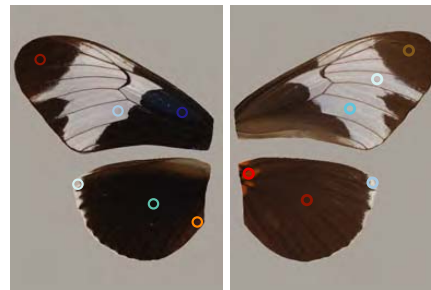

*H. sapho*

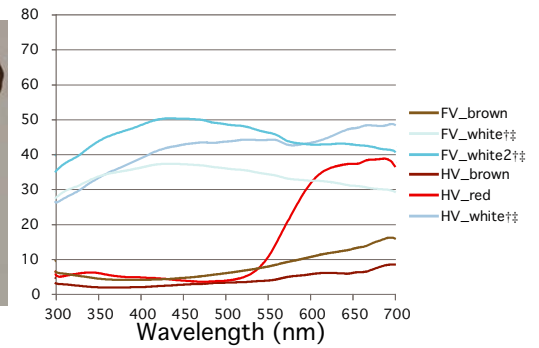

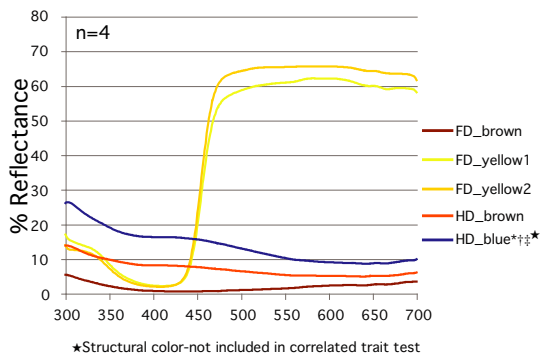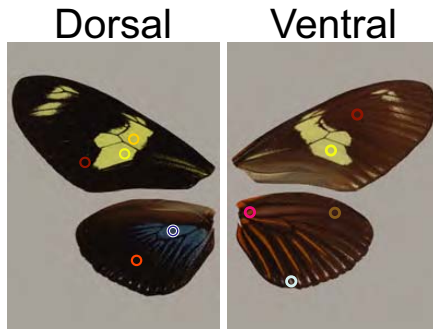

*H. doris*

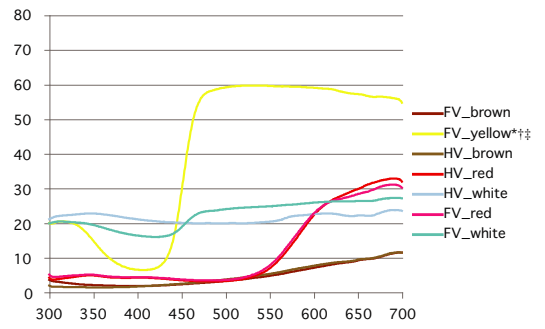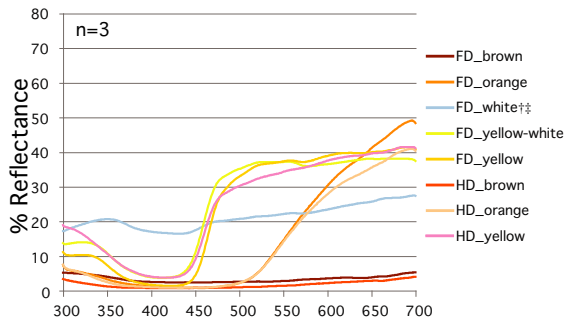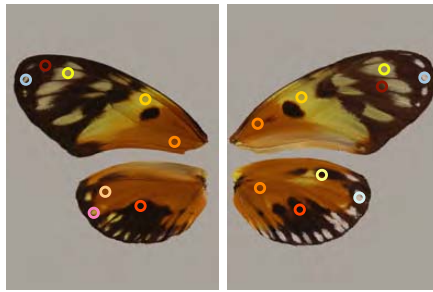

*H. numata*

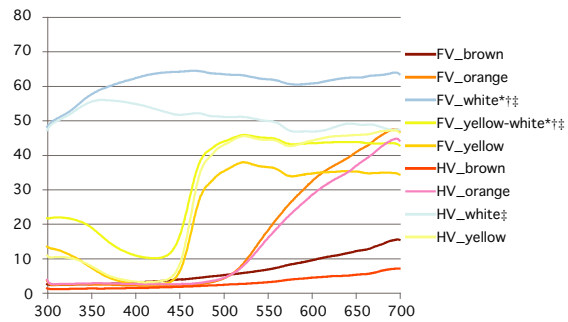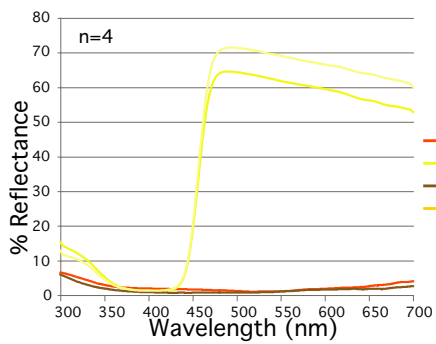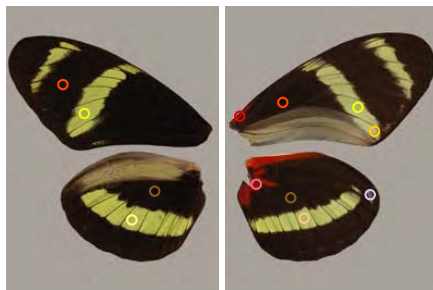

*H. pachinus*

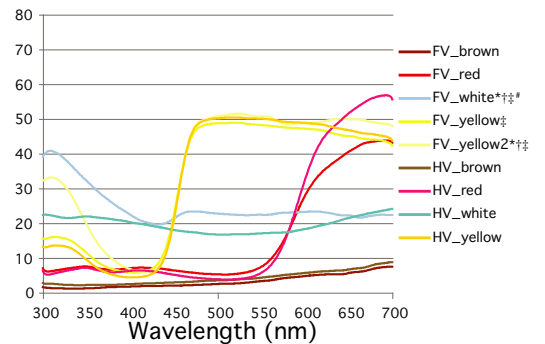

\*Found in 2 specimens at location of yellow2

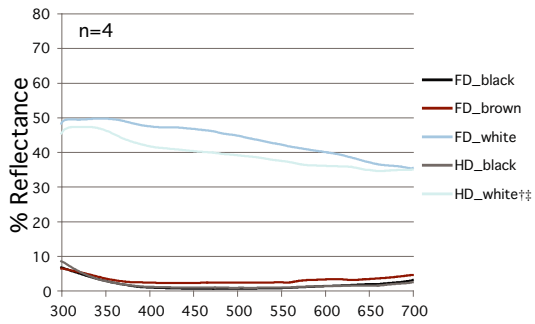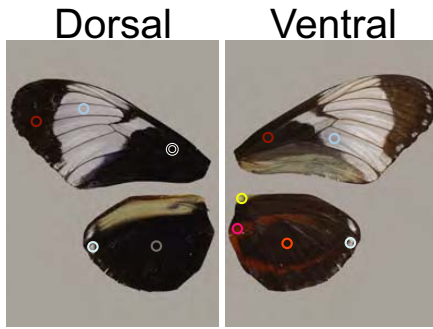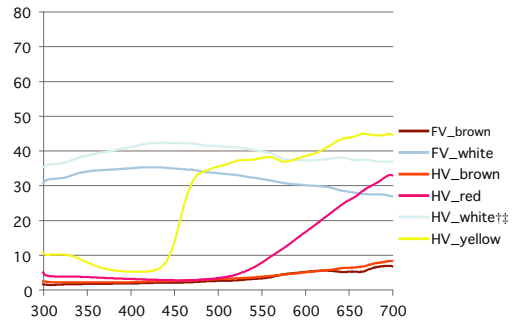

*H. cydno*

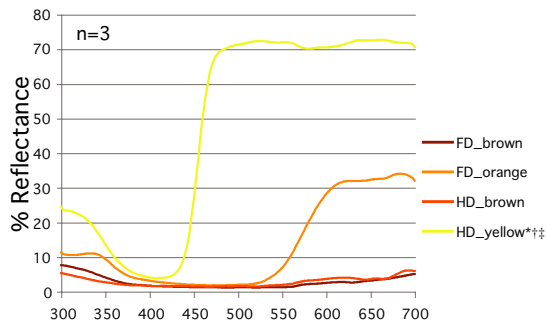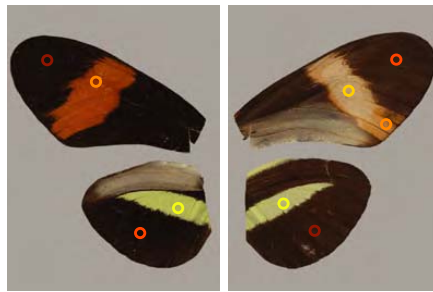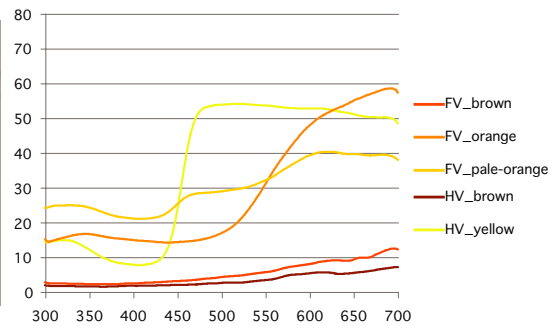

*H. melpomene*

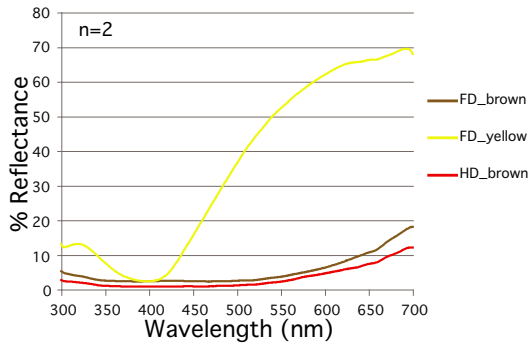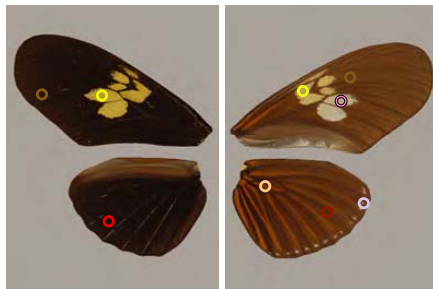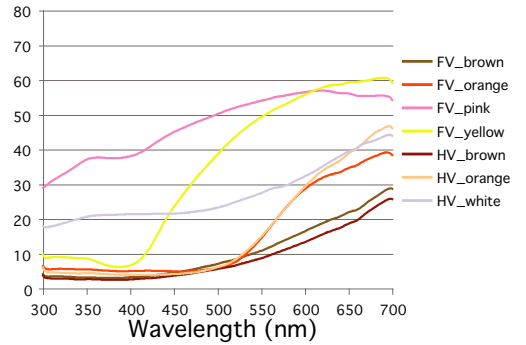

*E. heliconioides*

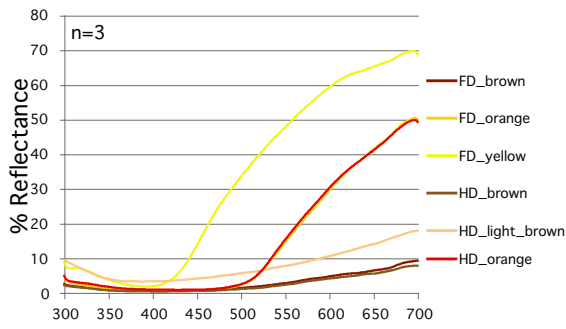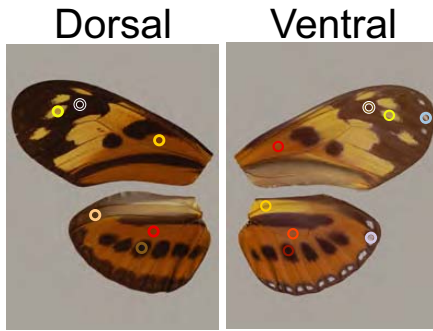

*E. isabella*

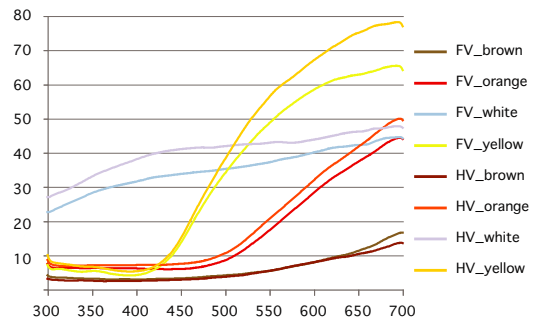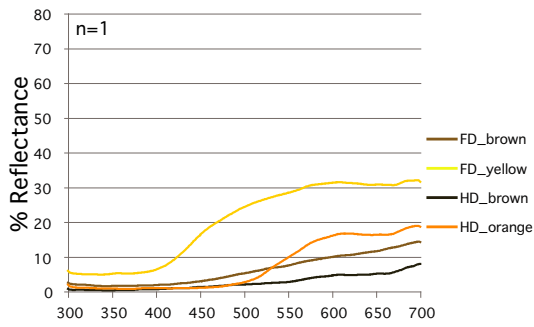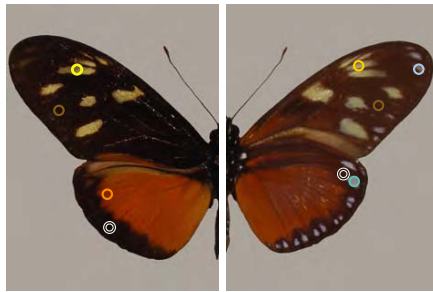

*E. procula*

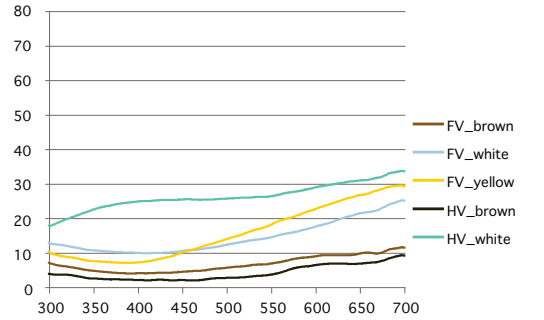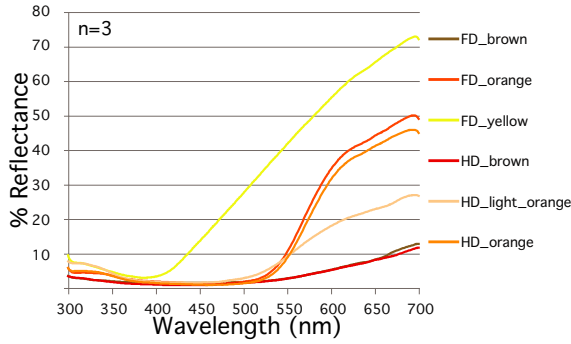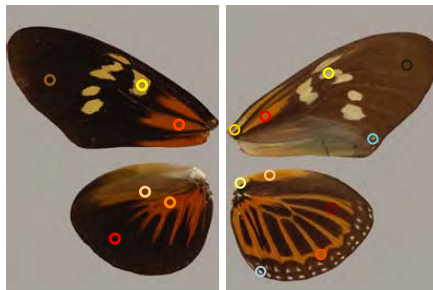

*E. thales*

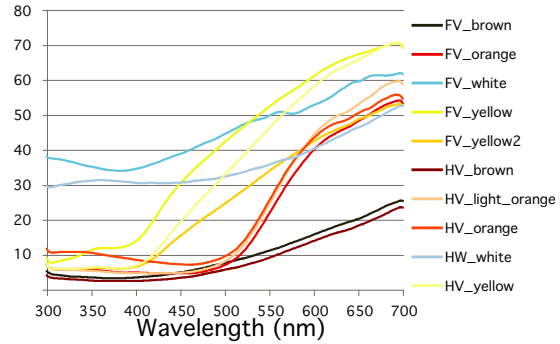

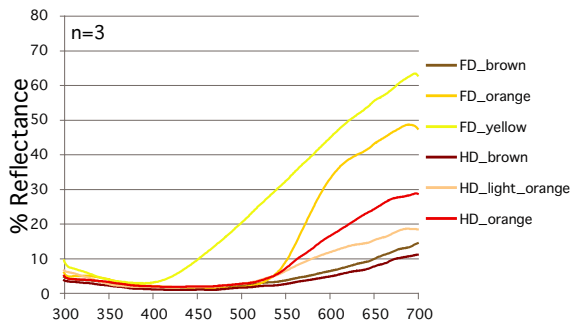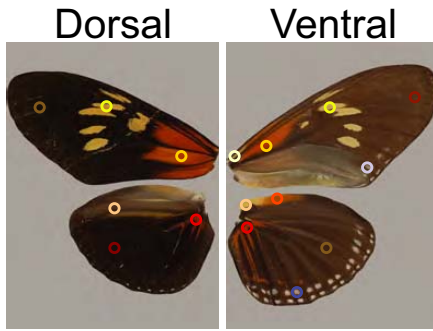

*E. surdus*

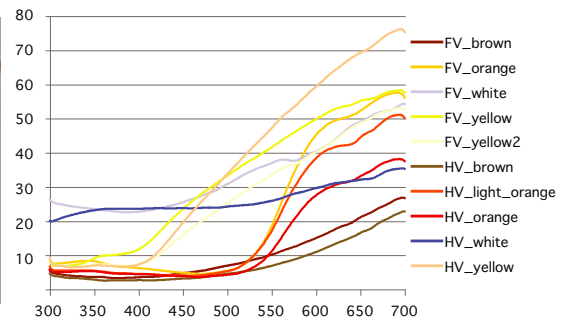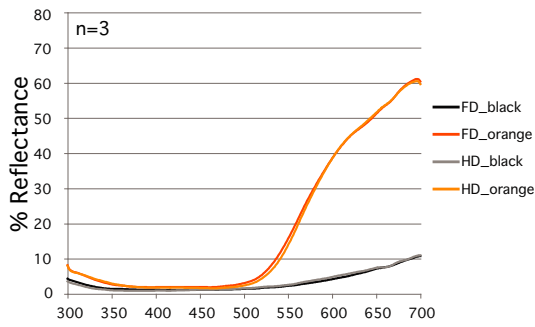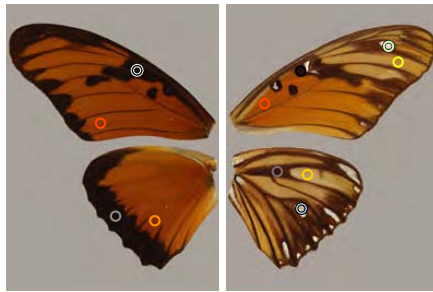

*A. v. lucina*

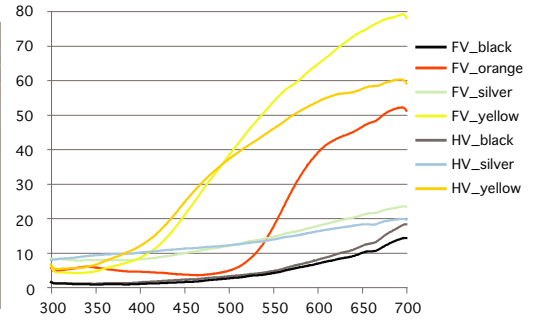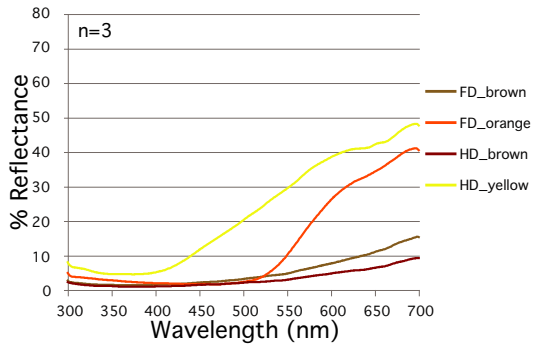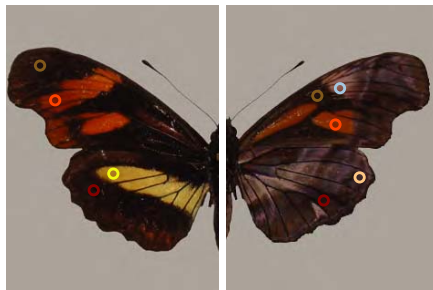

*P. telesiphe*

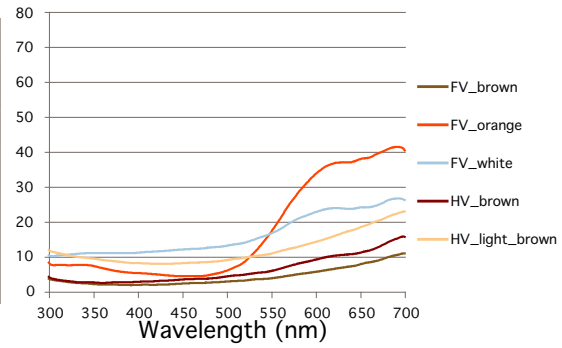

Supplement: 0910085107_sfig02.pdf [file 0910085107_sfig02.pdf]
