# Supplementary material
Source: PubMed Central journal article supplement (PMC2840532)

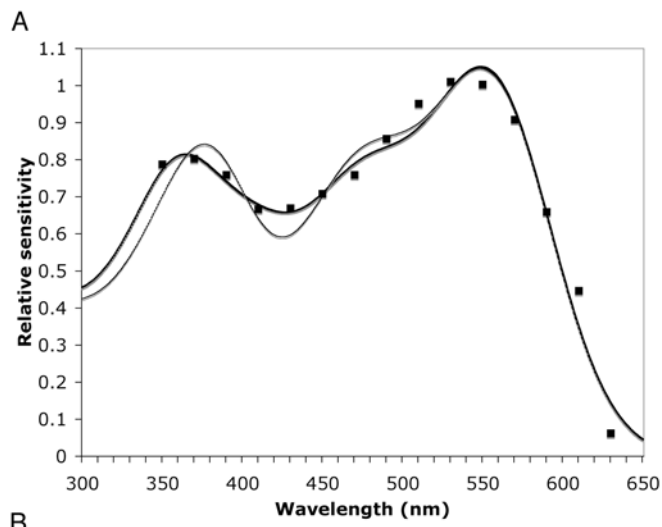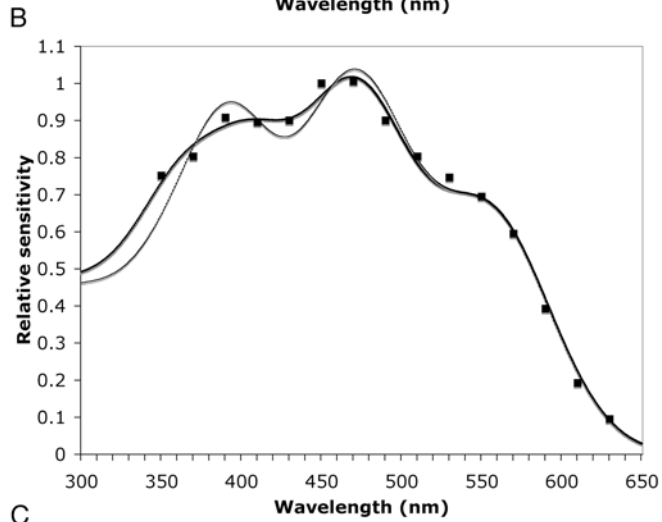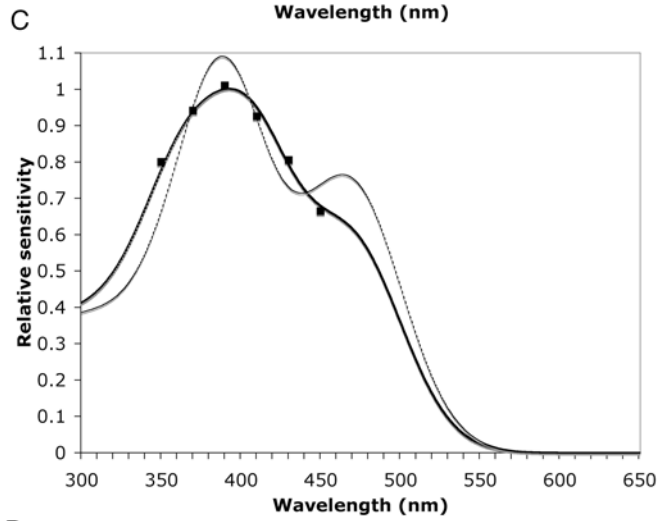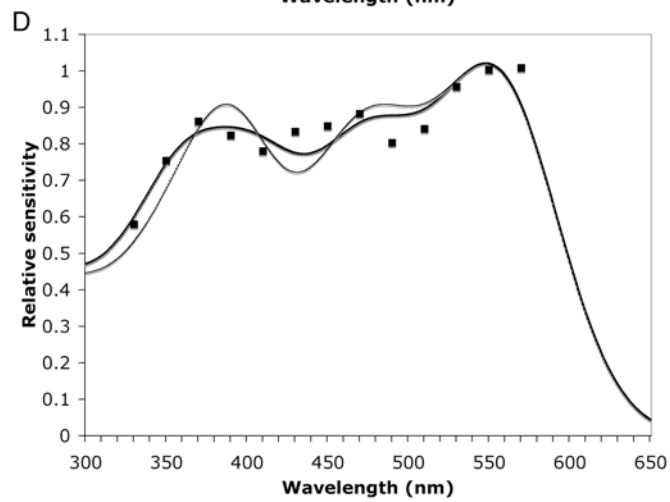

Supplement: 0910085107_sfig01.pdf [file 0910085107_sfig01.pdf]

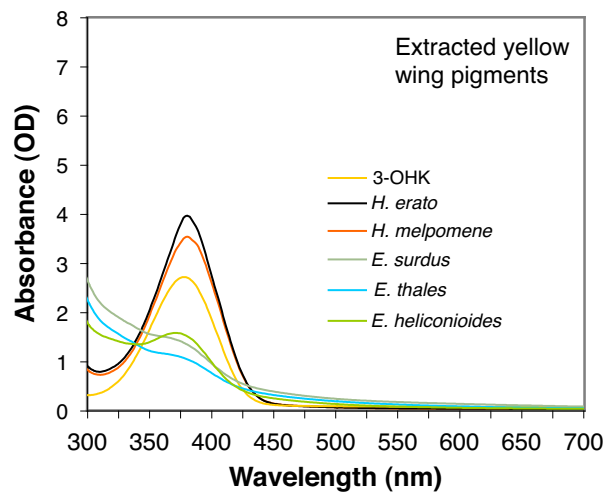

Supplement: 0910085107_sfig03.pdf [file 0910085107_sfig03.pdf]

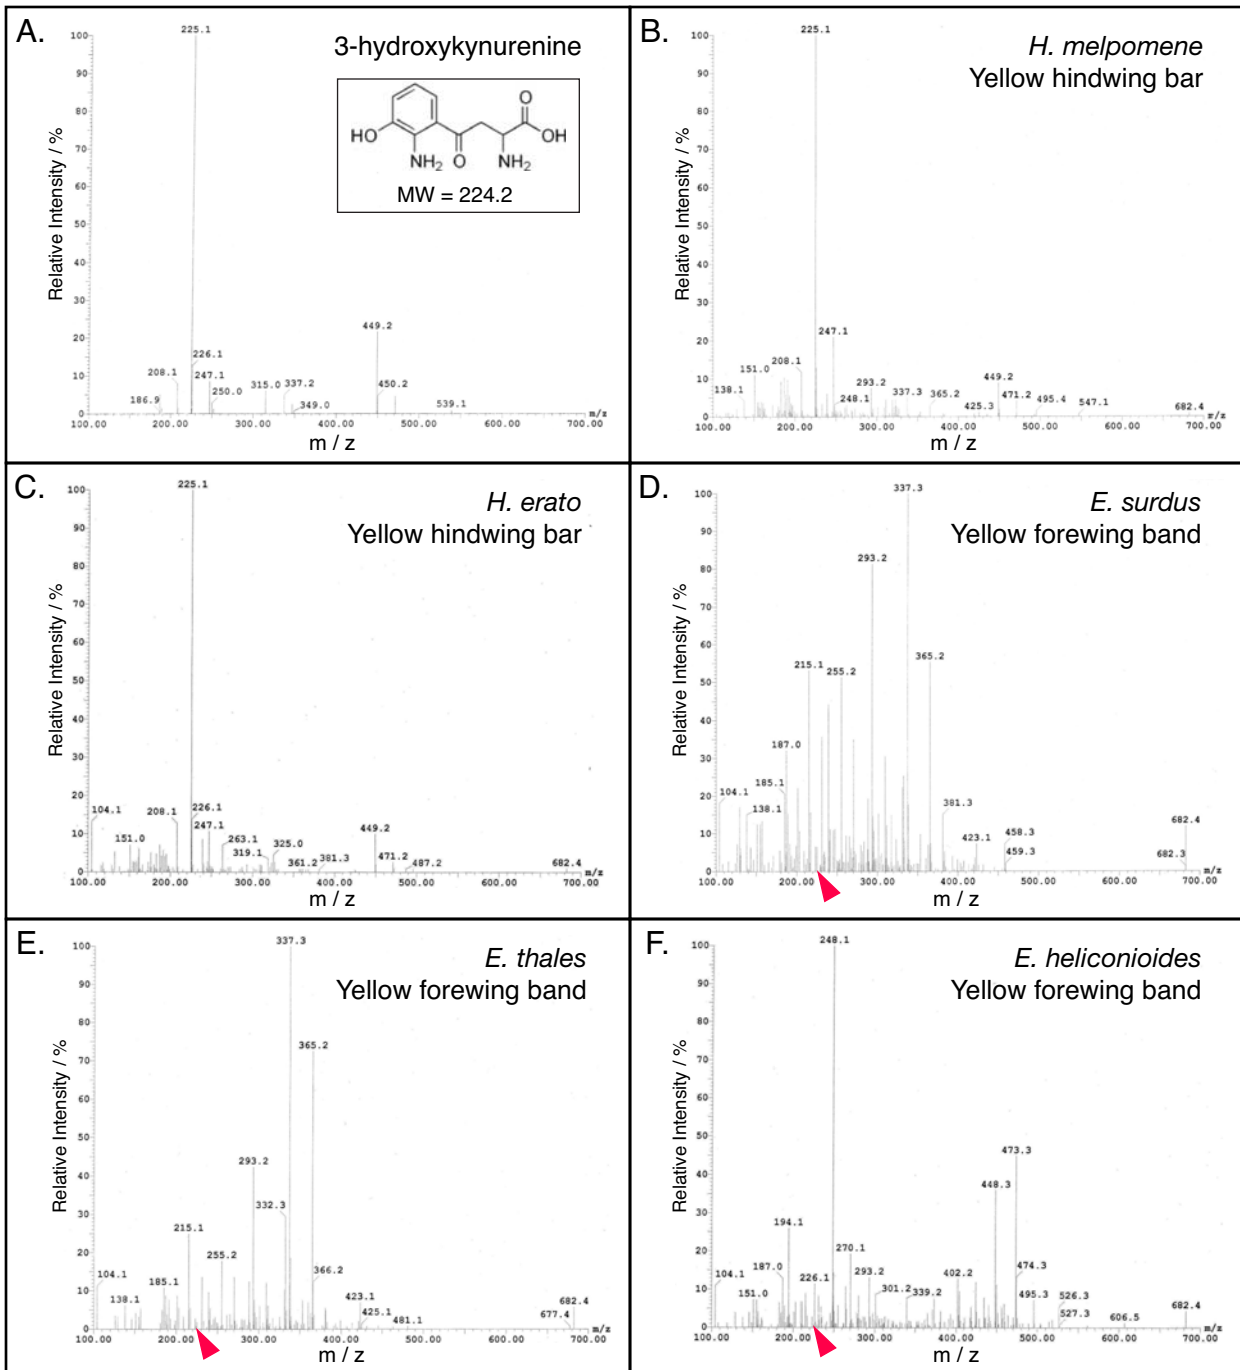

Supplement: 0910085107_sfig04.pdf [file 0910085107_sfig04.pdf]

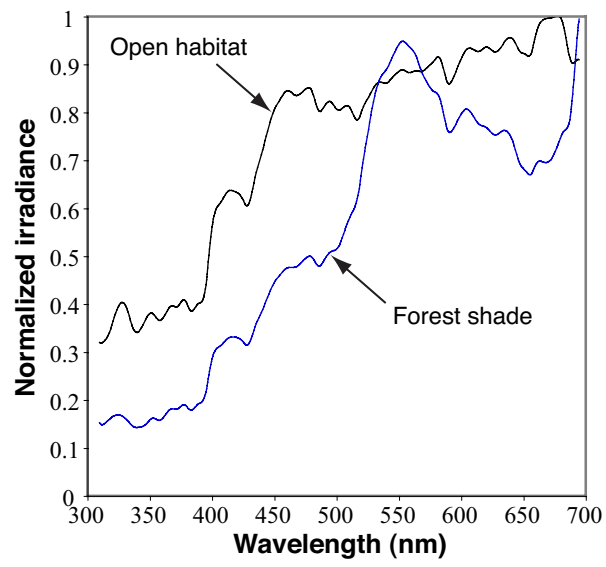

Supplement: 0910085107_sfig05.pdf [file 0910085107_sfig05.pdf]

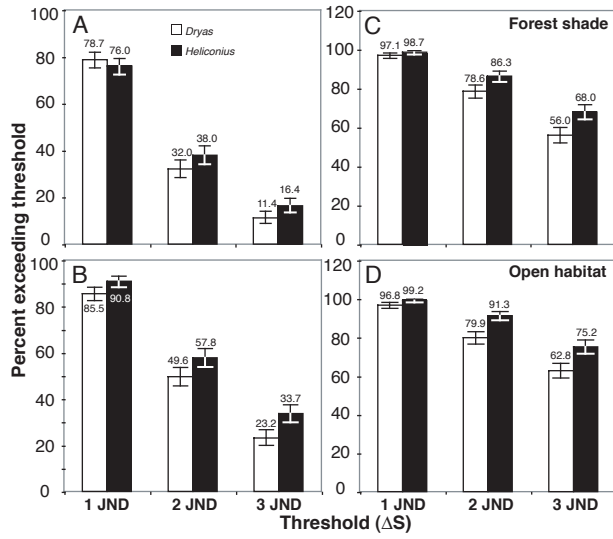

Supplement: 0910085107_sfig06.pdf [file 0910085107_sfig06.pdf]
